# Supplementary material for: A Retrospective Observational Analysis of Overall Survival with Sipuleucel-T in Medicare Beneficiaries Treated for Advanced Prostate Cancer
Source: Springer Nature journal article supplement (doi:10.1007/s12325-020-01509-5), 2020-10-07
Supplement: MOESM1 [file 18458562]

## Original Investigation

### SUPPLEMENTAL MATERIALS

#### Effectiveness of Sipuleucel-T on Overall Survival in Medicare Beneficiaries Treated for Advanced Prostate Cancer

**Authors:** McKay RR, Hafron J, Ferro C, Wilfehrt HM, Fitch K, Flanders SL, Fabrizio M, Schweizer M

This supplement contains materials referred to in the main paper as well as additional details regarding the model.

---

| <b>CONTENTS (In order of mention)</b>                                                                                               | <b>Page</b> |
|-------------------------------------------------------------------------------------------------------------------------------------|-------------|
| <b>Supplemental Figure 1.</b> Diagram of How Eligible Patients Were Identified                                                      | 2           |
| <b>Supplemental Figure 2.</b> Univariate Kaplan-Meier Survival Curves                                                               | 3           |
| <b>Supplemental Figure 3.</b> Exploratory Analyses by Line of Treatment: Univariate Kaplan Meier Curves with 95% Hall-Wellner Bands | 4           |
| <b>Supplemental Table 1.</b> Patient Characteristics by Cohort: Initial Population Explored During Model Development                | 5           |
| <b>Supplemental Table 2.</b> Summary of Initial Models Generated During Stepwise Process to Create Multivariable Model              | 7           |
| <b>Supplemental Table 3.</b> Prespecified List of Covariates Used During Model Development                                          | 8           |
| <b>Supplemental Table 4.</b> Description of Covariates Used in the Final Multivariate Model                                         | 10          |
| <b>Supplemental Table 5.</b> Patient Characteristics by Cohort: Testing Population Used During Model Development                    | 12          |

---

### Supplemental Figure 1. Diagram of How Eligible Patients Were Identified

A patient's data was reviewed to identify the first claim for prostate cancer treatment in 2014. Next, data from the previous 12 months was reviewed for any other claims for treatments for metastatic prostate cancer. If no other claims were identified, the date of the first claim in 2014 was identified as the index date. Afterwards, the data for up to the first 36 months (through 2017) or death, whichever came first, was analyzed. Details regarding death came from the link to the National Death Index<sup>22</sup>. This procedure was repeated for each patient.

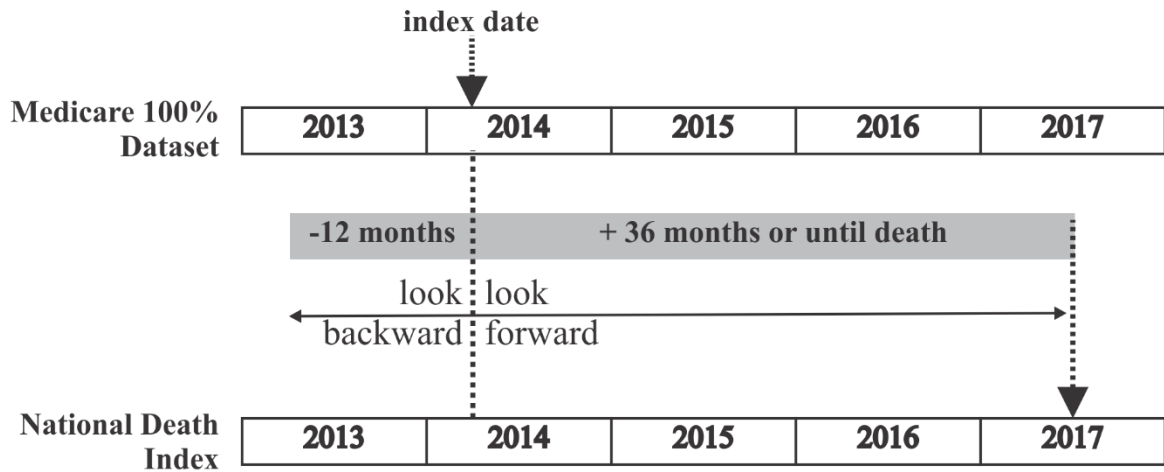

**Supplemental Figure 2. Univariate Kaplan-Meier Survival Curves**

**A.** Illustration of the curve for the first-line cohort. **B.** Illustration of the curve for the any-line cohort.  
Adapted from McKay et al 2020<sup>21</sup>

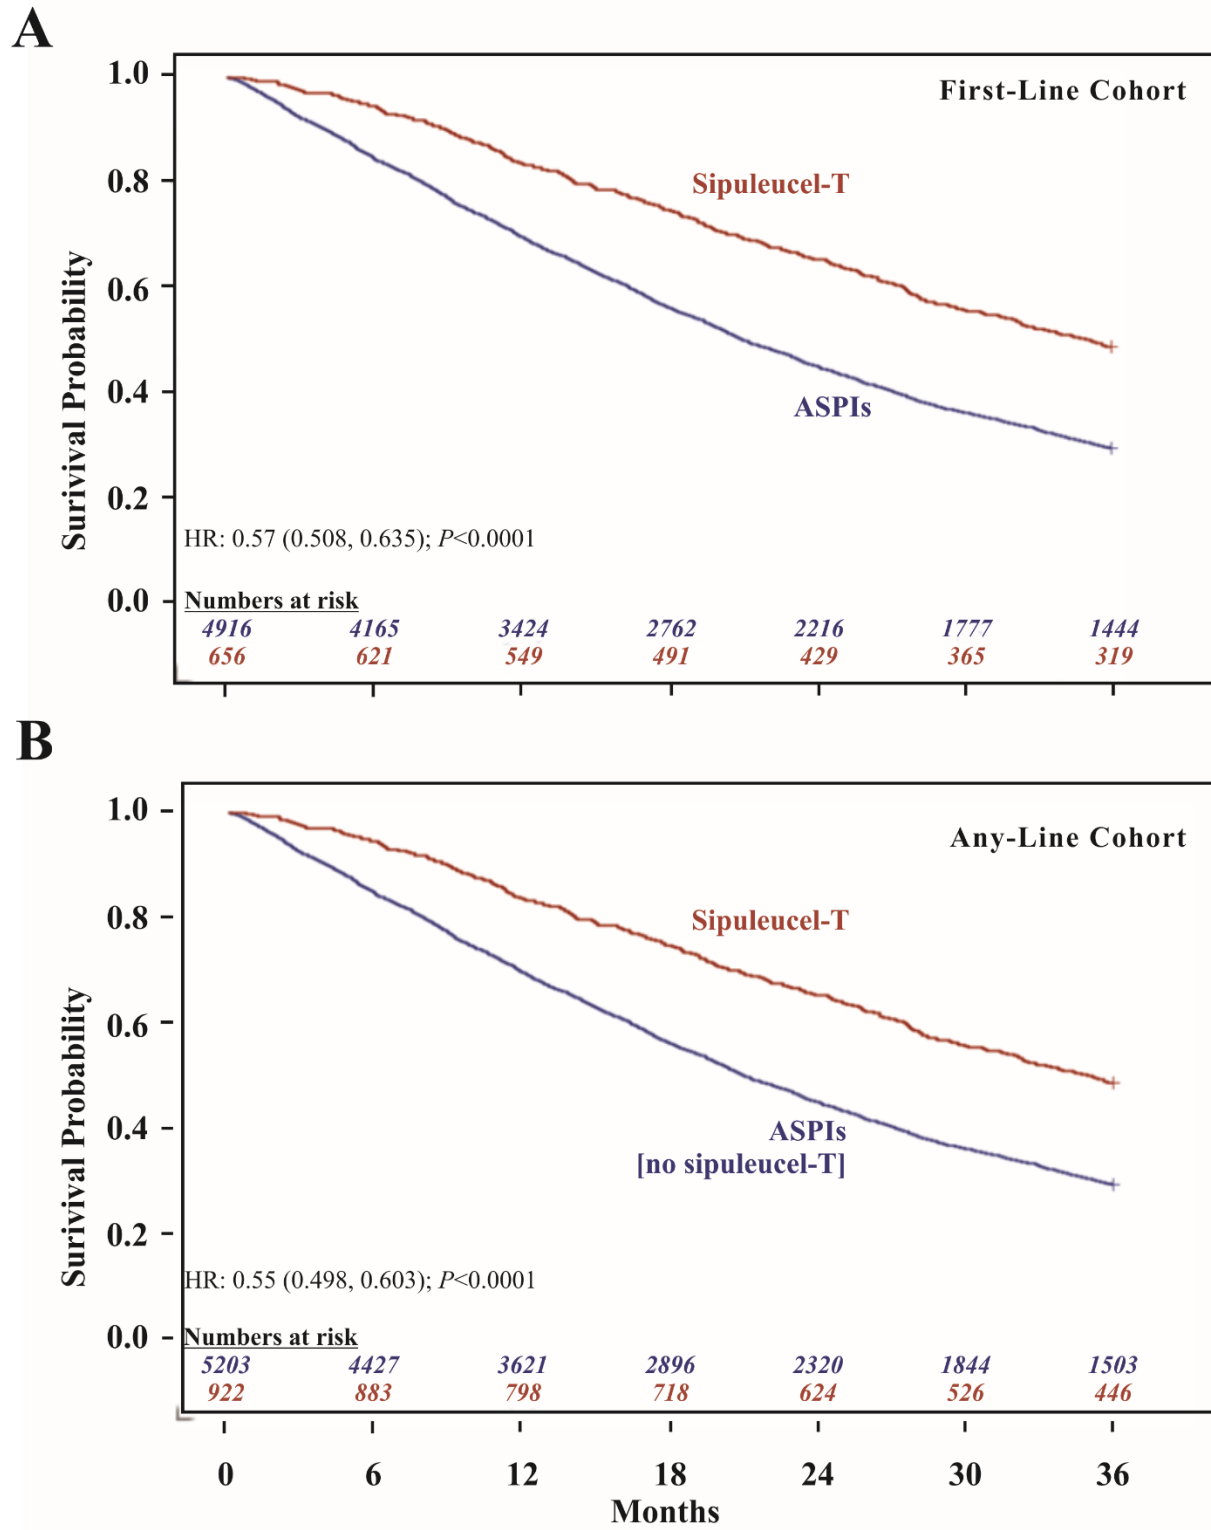

**Supplemental Figure 3. Exploratory Analyses by Line of Treatment: Univariate Kaplan Meier Curves with 95% Hall-Wellner Bands.**

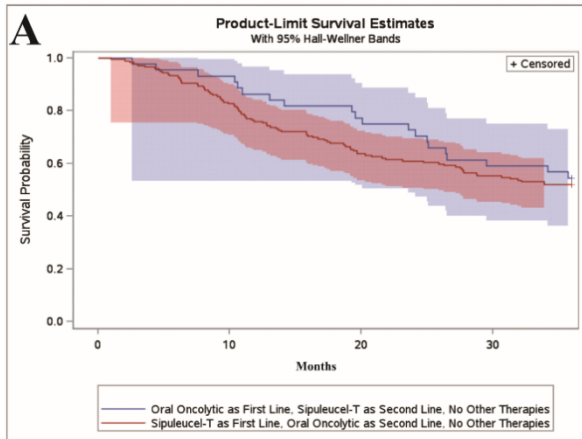

**A.** (red) first-line sipuleucel-T and second-line APSIs with no other therapies vs first-line APSIs and second-line sip-T with no other therapies (Hazard Ratio [HR], 1.1726 [95% Wald Confidence Limits: 0.7368, 1.9608]; P = 0.5213).

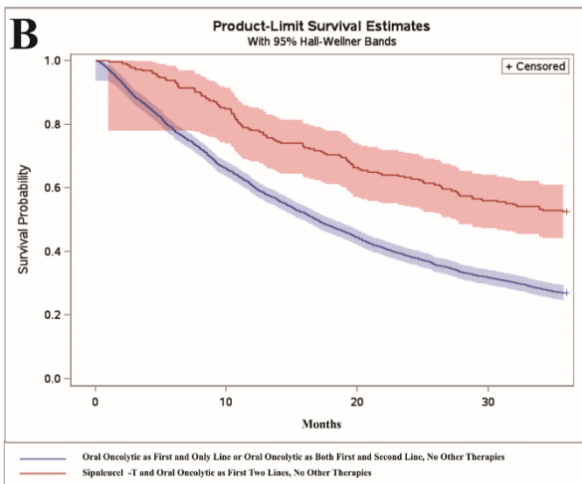

**B.** (red) sipuleucel-T and APSIs with no other therapies vs (blue) first- and only line APSIs or first- and second-line APSIs with no other therapies (HR, 0.4845 [0.3964, 0.5853]; P < 0.0001).

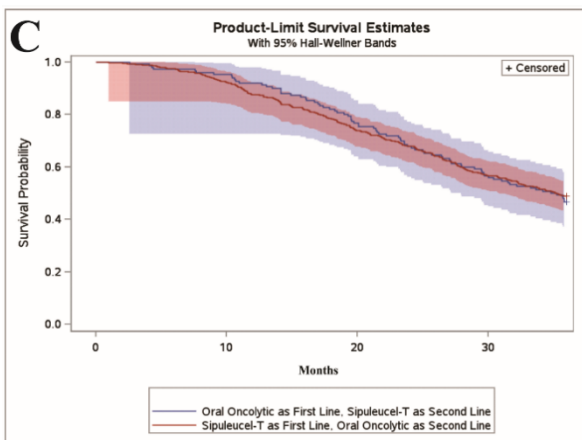

**C.** Describes outcomes with (red) first-line sipuleucel-T and second-line APSIs vs (blue line) first-line APSIs and second-line sipuleucel-T. Abbreviations: ASPI, androgen signaling pathway inhibitors (HR, 0.9744 [0.7622, 1.2600]; P = 0.8396).

**Supplemental Table 1. Patient Characteristics by Cohort: Initial Population Explored During Model Development**

| Characteristic                                                                                      | First-line Cohort       |                   | Any-line Cohort         |                                              |
|-----------------------------------------------------------------------------------------------------|-------------------------|-------------------|-------------------------|----------------------------------------------|
|                                                                                                     | Sipuleucel-T<br>(n=449) | ASPI<br>(n=3,240) | Sipuleucel-T<br>(n=614) | ASPI<br>(Never<br>Sipuleucel-T)<br>(n=3,439) |
| No. (%) of patients by age group                                                                    |                         |                   |                         |                                              |
| < 65 years old                                                                                      | --                      | 53 (2%)           | 11 (2%)                 | 89 (3%)                                      |
| 65–69 years old                                                                                     | 71 (16%)                | 325 (10%)         | 103 (17%)               | 354 (10%)                                    |
| 70–74 years old                                                                                     | 144 (32%)               | 654 (20%)         | 188 (31%)               | 714 (21%)                                    |
| 75–79 years old                                                                                     | 106 (24%)               | 742 (23%)         | 163 (27%)               | 789 (23%)                                    |
| 80–84 years old                                                                                     | 76 (17%)                | 682 (21%)         | 97 (16%)                | 709 (21%)                                    |
| 85–89 years old                                                                                     | 39 (9%)                 | 552 (17%)         | 46 (7%)                 | 544 (16%)                                    |
| 90+ years old                                                                                       | --                      | 232 (7%)          | --                      | 240 (7%)                                     |
| Average Age, years                                                                                  | 75.3                    | 78.6              | 75.2                    | 78.2                                         |
| Median Age, years                                                                                   | 74.0                    | 79.0              | 75.0                    | 78.0                                         |
| No. (%) of patients by race                                                                         |                         |                   |                         |                                              |
| Black                                                                                               | 34 (8%)                 | 333 (10%)         | 45 (7%)                 | 383 (11%)                                    |
| White                                                                                               | 391 (87%)               | 2,743 (85%)       | 542 (88%)               | 2,871 (83%)                                  |
| Other                                                                                               | 24 (5%)                 | 164 (5%)          | 27 (4%)                 | 185 (5%)                                     |
| No. (%) of patients with weighted Charlson Comorbidity Index score <sup>a</sup> within stated range |                         |                   |                         |                                              |
| 0–3                                                                                                 | 37 (8%)                 | 366 (11%)         | 52 (8%)                 | 363 (11%)                                    |
| 4–7                                                                                                 | 30 (7%)                 | 349 (11%)         | 43 (7%)                 | 340 (10%)                                    |
| 8–11                                                                                                | 299 (67%)               | 1,872 (58%)       | 434 (71%)               | 2,035 (59%)                                  |
| 12–15                                                                                               | 76 (17%)                | 566 (17%)         | 82 (13%)                | 601 (17%)                                    |
| 16–19                                                                                               | --                      | 82 (3%)           | --                      | 97 (3%)                                      |
| 20–24                                                                                               | 0 (0%)                  | --                | 0 (0%)                  | --                                           |
| Median Score                                                                                        | 9.0                     | 9.0               | 9.0                     | 9.0                                          |
| No. (%) of patients by type of eligibility                                                          |                         |                   |                         |                                              |
| Both Medicare and Medicaid                                                                          | 35 (8%)                 | 462 (14%)         | 41 (7%)                 | 499 (15%)                                    |
| One or the other                                                                                    | 414 (92%)               | 2,778 (86%)       | 573 (93%)               | 2,940 (85%)                                  |
| No. (%) of patients with specified numbers of mCRPC lines of therapy                                |                         |                   |                         |                                              |
| One                                                                                                 | 70 (16%)                | 1,460 (45%)       | 65 (11%)                | 1,468 (43%)                                  |
| Two                                                                                                 | 131 (29%)               | 977 (30%)         | 161 (26%)               | 1,097 (32%)                                  |
| Three                                                                                               | 125 (28%)               | 470 (15%)         | 183 (30%)               | 554 (16%)                                    |
| Four                                                                                                | 75 (17%)                | 267 (8%)          | 126 (21%)               | 261 (8%)                                     |
| Five                                                                                                | 43 (10%)                | 62 (2%)           | 63 (10%)                | 59 (2%)                                      |
| Six                                                                                                 | --                      | --                | 16 (3%)                 | 0 (0%)                                       |
| Median time to 2nd line (mon)                                                                       | 4.8                     | 9.2               | 5.3                     | 8.8                                          |
| Opioid utilization around index <sup>b</sup>                                                        |                         |                   |                         |                                              |
| Chronic Use                                                                                         | 37 (8%)                 | 556 (17%)         | 59 (10%)                | 624 (18%)                                    |
| No Chronic Use                                                                                      | 412 (92%)               | 2,684 (83%)       | 555 (90%)               | 2,815 (82%)                                  |

|                                                                                                           |           |             |           |             |
|-----------------------------------------------------------------------------------------------------------|-----------|-------------|-----------|-------------|
| No. (%) of patients having multiple metastasis sites <sup>c</sup>                                         |           |             |           |             |
| Yes                                                                                                       | 86 (19%)  | 726 (22%)   | 118 (19%) | 822 (24%)   |
| No                                                                                                        | 363 (81%) | 2,514 (78%) | 496 (81%) | 2,617 (76%) |
| No. (%) of patients having $\geq 1$ SRE <sup>d</sup> around index date                                    |           |             |           |             |
| Yes                                                                                                       | 62 (14%)  | 703 (22%)   | 95 (15%)  | 750 (22%)   |
| No                                                                                                        | 387 (86%) | 2,537 (78%) | 519 (85%) | 2,689 (78%) |
| No. (%) of patients by number of days of corticosteroid use within 6 months after index date <sup>e</sup> |           |             |           |             |
| < 60 Days                                                                                                 | 445 (99%) | 3,186 (98%) | 604 (98%) | 3,346 (97%) |
| $\geq 60$ Days                                                                                            | --        | 54 (2%)     | --        | 93 (3%)     |
| No. (%) of patients by corticosteroid PDC <sup>f</sup> within 6 months after index date <sup>e</sup>      |           |             |           |             |
| < 0.2                                                                                                     | 440 (98%) | 3,150 (97%) | 598 (97%) | 3,297 (96%) |
| 0.2–0.4                                                                                                   | --        | 29 (1%)     | --        | 40 (1%)     |
| 0.4–0.6                                                                                                   | --        | 27 (1%)     | --        | 26 (1%)     |
| 0.6–0.8                                                                                                   | --        | 11 (0%)     | --        | 21 (1%)     |
| > 0.8                                                                                                     | 0 (0%)    | 23 (1%)     | --        | 55 (2%)     |

Abbreviation: ASPI, androgen signaling pathway inhibitor; CI, confidence interval; coeff, coefficient; cov, covariate; PDC, proportion of days covered; ref, reference; v., versus; na=not applicable; --=indicates cell was suppressed due to insufficient numbers of patients available

<sup>a</sup> Charlson comorbidity index score was assigned based on claims in year before the index date. A score of 0 indicates that no comorbidities were found; worse comorbidity was indicated by higher scores, with a maximum score possible of 33.

<sup>b</sup> Chronic opioid use defined as two or more 30-day scripts within 60 days before or after the index date

<sup>c</sup> 1+ claims in year before the index date

<sup>d</sup> 1+ claims in the 90 days before until 90 days after the index date

<sup>e</sup> Corticosteroid-use related variables shown here do not include abiraterone users receiving corticosteroid as per abiraterone label.

<sup>f</sup> PDC=Proportion of Days Covered refers to the numbers of day supply of corticosteroids divided by the difference of total days alive in the study minus the number of days spent in inpatient or skilled nursing facility care.

**Supplemental Table 2. Summary of Initial Models Generated During Stepwise Process to Create Multivariable Model**

| Model                           | 36-Month Observation Period              |                  |                |                |
|---------------------------------|------------------------------------------|------------------|----------------|----------------|
|                                 | HR (95% CL)                              | P-value          | AIC            | SBC            |
| First-line Cohort               |                                          |                  |                |                |
| <i>Significance level=0.05</i>  |                                          |                  |                |                |
| Forward selection model         | 0.5472<br>(0.4705, 0.6337)               | <0.001           | 36551.5        | 36708.2        |
| Backward selection model        | 0.5472<br>(0.4705, 0.6337)               | <0.001           | 36551.5        | 36708.2        |
| Stepwise selection model        | 0.5472<br>(0.4705, 0.6337)               | <0.001           | 36551.5        | 36708.2        |
| <i>Significance level=0.01</i>  |                                          |                  |                |                |
| Forward selection model         | 0.5457<br>(0.4692, 0.6320)               | <0.001           | 36557.5        | 36702.6        |
| Backward selection model        | 0.5457<br>(0.4692, 0.6320)               | <0.001           | 36557.5        | 36702.6        |
| Stepwise selection model        | 0.5457<br>(0.4692, 0.6320)               | <0.001           | 36557.5        | 36702.6        |
| Any-line Cohort                 |                                          |                  |                |                |
| <i>Significance level=0.05</i>  |                                          |                  |                |                |
| Forward selection model         | 0.6027<br>(0.5272, 0.6868)               | <0.001           | 40436.9        | 40572.4        |
| Backward selection model        | 0.6036<br>(0.5280, 0.6879)               | <0.001           | 40435.9        | 40577.3        |
| <b>Stepwise selection model</b> | <b>0.6027</b><br><b>(0.5272, 0.6868)</b> | <b>&lt;0.001</b> | <b>40436.9</b> | <b>40572.4</b> |
| <i>Significance level=0.01</i>  |                                          |                  |                |                |
| Forward selection model         | 0.6027<br>(0.5272, 0.6868)               | <0.001           | 40436.9        | 40572.4        |
| Backward selection model        | 0.6036<br>(0.5280, 0.6879)               | <0.001           | 40435.9        | 40577.3        |
| Stepwise selection model        | 0.6027<br>(0.5272, 0.6868)               | <0.001           | 40436.9        | 40572.4        |

Abbreviation: AIC, Akaike Information Criterion; CL, confidence limits; HR, hazard ratio; SBC, Schwarz Bayes Criterion.

The bold text indicates the model moved forward for final testing and use.

**Supplemental Table 3. Prespecified List of Covariates Used During Model Development**

| <b>Prespecified Covariates</b>                                                                          |
|---------------------------------------------------------------------------------------------------------|
| Age                                                                                                     |
| Race                                                                                                    |
| CDC Region <sup>1</sup>                                                                                 |
| Urban/Rural – Type of region                                                                            |
| Dual/Non-Dual – Both Medicare and Medicaid Eligible / Eligible for only one                             |
| mCRPC Lines of Therapy                                                                                  |
| Time to mCRPC Second Line Therapy                                                                       |
| Charlson Comorbidity Index <sup>2</sup>                                                                 |
| Opioid Utilization Around Index <sup>3</sup>                                                            |
| SRE Around Index - Radiation Therapy <sup>5</sup>                                                       |
| SRE Around Index - Bone Fracture <sup>6</sup>                                                           |
| SRE Around Index - Spinal Cord Compression <sup>6</sup>                                                 |
| SRE Around Index - Bone Surgery <sup>6</sup>                                                            |
| SRE Around Index - Any                                                                                  |
| 60+ days of corticosteroid coverage within 6 months after index date                                    |
| 60+ days corticosteroid coverage at any time after index date                                           |
| 60+ days of corticosteroid coverage within 6 months after index date, not including use by Abi patients |
| 60+ days corticosteroid coverage at any time after index date, not including use by Abi patients        |
| Corticosteroid PDC <sup>7</sup> within 6 months after index date, not including use by Abi patients     |
| HCC Community Score <sup>8</sup>                                                                        |
| Median Household Income <sup>9</sup>                                                                    |
| Metastases <sup>4</sup> - Any                                                                           |
| Metastases <sup>4</sup> - Multiple                                                                      |
| Metastases <sup>4</sup> - Bone Only                                                                     |
| Metastases <sup>4</sup> - Liver Only                                                                    |
| Metastases <sup>4</sup> - Lung Only                                                                     |
| Metastases <sup>4</sup> - Lymph Only                                                                    |
| Metastases <sup>4</sup> - Visceral Only                                                                 |
| Metastases <sup>4</sup> - Other Only                                                                    |
| Metastases <sup>4</sup> - Bone + Liver                                                                  |
| Metastases <sup>4</sup> - Bone + Lung                                                                   |
| Metastases <sup>4</sup> - Bone + Lymph                                                                  |
| Metastases <sup>4</sup> - Bone + Visceral                                                               |
| Metastases <sup>4</sup> - Bone + Other                                                                  |
| Metastases <sup>4</sup> - Liver + Lung                                                                  |



---

Metastases<sup>4</sup> - Liver + Lymph  
Metastases<sup>4</sup> - Liver + Visceral  
Metastases<sup>4</sup> - Liver + Other  
Metastases<sup>4</sup> - Lung + Lymph  
Metastases<sup>4</sup> - Lung + Visceral  
Metastases<sup>4</sup> - Lung + Other  
Metastases<sup>4</sup> - Lymph + Visceral  
Metastases<sup>4</sup> - Lymph + Other  
Metastases<sup>4</sup> - Visceral + Other

---

*Abbreviations:* ACS, American Community Survey; CDC, Centers for Disease Control; HCC, Hierarchical Condition Category; mCRPC, metastatic castration-resistant prostate cancer; PDC, proportion of Days Covered; SRE, skeletal-related events

<sup>1</sup> <https://www.cdc.gov/coordinatedchronic/docs/NCCDPHP-Regions-Map.pdf>

<sup>2</sup> Charlson comorbidity index score was assigned based on claims in year before the index date. A score of 0 indicates that no comorbidities were found, level of comorbidity indicated by higher scores, maximum score possible is 33

<sup>2</sup> Chronic opioid use defined as two or more 30-day scripts within 60 days before or after the index date

<sup>4</sup> 1+ claims in year before the index date

<sup>5</sup> 1+ claims in the 60 days before until 60 days after the index date

<sup>6</sup> 1+ claims in the 90 days before until 90 days after the index date

<sup>7</sup> Proportion of Days Covered refers to the numbers of day supply of corticosteroids divided by the total days alive in the study less the number of days spent in inpatient or skilled nursing facility care

<sup>8</sup> HCC community score is assigned based on claims in year before the index date and patients' sex, date of birth, original reason for entitlement to Medicare, and Medicaid-status. The score was produced using version 22, model year 2014, of the CMS-HCC Risk Adjustment Model

<sup>9</sup> Median household income is derived from the 2014 ACS median household Income data and the patients' zip code of residence during the index year

**Supplemental Table 4. Description of Covariates Used in the Final Multivariate Model**

| <b>Covariate</b>                                                                                           | <b>Description</b>                                                                                                                                                                                                                                                                                                                                                                                                                                                                                                   | <b>How Identified</b>                                                                                                     |
|------------------------------------------------------------------------------------------------------------|----------------------------------------------------------------------------------------------------------------------------------------------------------------------------------------------------------------------------------------------------------------------------------------------------------------------------------------------------------------------------------------------------------------------------------------------------------------------------------------------------------------------|---------------------------------------------------------------------------------------------------------------------------|
| Treatment                                                                                                  | <b>Primary covariate</b><br><i>Model 1:</i> First-line mCRPC therapy sipuleucel-T vs. first-line ASPI<br><i>Model 2:</i> Any-line sipuleucel-T use vs. any-line ASPI without use of sipuleucel-T                                                                                                                                                                                                                                                                                                                     | NDC codes                                                                                                                 |
| < 60 vs 60+ days of corticosteroid coverage within 6 months following index date (categorical)             | Indication of 60+ days of oral corticosteroid utilization in the 6 months following index therapy; this excludes use of corticosteroids when used concomitantly in patients receiving abiraterone                                                                                                                                                                                                                                                                                                                    | NDC codes                                                                                                                 |
| Age (continuous variable)                                                                                  | Age at time of index therapy (based on actual date of birth)                                                                                                                                                                                                                                                                                                                                                                                                                                                         | Identifiers in reviewed claims                                                                                            |
| Charlson Comorbidity Index (continuous variable)                                                           | Increased comorbidity indicated by higher scores, (range, 0 to 33)                                                                                                                                                                                                                                                                                                                                                                                                                                                   | A selection of ICD-9-CM codes <sup>12</sup>                                                                               |
| Proportion of Days Covered (PDC) for patients with corticosteroid use within 6 months following index date | Proportion of days covered by corticosteroid prescriptions in the 6 months following index therapy (the number of days in inpatient or skilled nursing facility not included in 6-month denominator); this excludes use of corticosteroids when used concomitantly with abiraterone. Proportion of Days Covered refers to the supply of corticosteroids (in terms of days) divided by the total days alive in the study minus the number of days spent in inpatient or skilled nursing facility care (range, 0 to 1) | NDC codes                                                                                                                 |
| Dual vs Non-Dual Eligibility (categorical)                                                                 | Indication of full or partial dual eligibility in both Medicare and Medicaid or only Medicare. Dual eligibility typically is a flag for worse status.                                                                                                                                                                                                                                                                                                                                                                |                                                                                                                           |
| mCRPC Lines of Therapy (continuous)                                                                        | Number of mCRPC therapies received by the patient during the analysis period (range, 1 to 6)                                                                                                                                                                                                                                                                                                                                                                                                                         | NDC codes                                                                                                                 |
| Having multiple metastasis sites (yes or no)                                                               | Identified by reviewing diagnosis codes for indication of multiple sites of metastasis in the year before index date                                                                                                                                                                                                                                                                                                                                                                                                 | Number of claims with ICD-9-CM diagnosis codes indicating such were present during the year before index date (2013-2014) |
| Opioid Utilization Around Index (yes or no)                                                                | Indication of chronic opioid utilization within 60 days before or after index therapy, with chronic use defined as 2+ scripts of 30 days within 60 days before and after index date                                                                                                                                                                                                                                                                                                                                  | NDC codes                                                                                                                 |
| Race (categorical)                                                                                         | Race of patient: White, Black, Other                                                                                                                                                                                                                                                                                                                                                                                                                                                                                 | Identifiers in examined claims                                                                                            |

| <b>Covariate</b>                                           | <b>Description</b>                                                                                                                                                                                                                             | <b>How Identified</b>                                                                                                                                                  |
|------------------------------------------------------------|------------------------------------------------------------------------------------------------------------------------------------------------------------------------------------------------------------------------------------------------|------------------------------------------------------------------------------------------------------------------------------------------------------------------------|
| Any Skeletal Related Events (SRE) Around Index (yes or no) | Indication of whether an SRE incurred around time off index therapy, with SRE including $\geq 1$ occurrence of radiation therapy, bone fracture, spinal cord compression, or bone surgery                                                      | claims for bone fracture, bone surgery, or spinal cord compression in the 90-day window before or after the index date and/or radiation therapy within a 60-day window |
| Time to mCRPC Second Line Therapy (categorical)            | Number of months (30 day increments) from the time of index therapy to the second mCRPC therapy: 'No Second Line Therapy' '0 to 3 months,' '3 to 6 months,' '6 to 9 months,' '9 to 12 months,' '12 to 15 months,' and 'Greater than 15 months' | Calculation and categorization of the time between treatments                                                                                                          |

**Supplemental Table 5. Patient Characteristics by Cohort: Testing Population Used During Model Development**

| Characteristic                                                                                      | First-line Cohort       |                   | Any-line Cohort         |                                              |
|-----------------------------------------------------------------------------------------------------|-------------------------|-------------------|-------------------------|----------------------------------------------|
|                                                                                                     | Sipuleucel-T<br>(n=198) | ASPI<br>(n=1,570) | Sipuleucel-T<br>(n=292) | ASPI<br>(Never<br>Sipuleucel-T)<br>(n=1,653) |
| No. (%) of patients by age group                                                                    |                         |                   |                         |                                              |
| < 65 years old                                                                                      | --                      | 44 (3%)           | --                      | 32 (2%)                                      |
| 65–69 years old                                                                                     | 30 (15%)                | 163 (10%)         | 47 (16%)                | 184 (11%)                                    |
| 70–74 years old                                                                                     | 50 (25%)                | 283 (18%)         | 93 (32%)                | 321 (19%)                                    |
| 75–79 years old                                                                                     | 58 (29%)                | 372 (24%)         | 73 (25%)                | 373 (23%)                                    |
| 80–84 years old                                                                                     | 32 (16%)                | 332 (21%)         | 41 (14%)                | 358 (22%)                                    |
| 85–89 years old                                                                                     | 18 (9%)                 | 268 (17%)         | 25 (9%)                 | 285 (17%)                                    |
| 90+ years old                                                                                       | --                      | 108 (7%)          | --                      | 100 (6%)                                     |
| Average age, years                                                                                  | 75.9                    | 78.5              | 75.3                    | 78.4                                         |
| Median age, years                                                                                   | 76.0                    | 78.0              | 74.0                    | 78.0                                         |
| No. (%) of patients by race                                                                         |                         |                   |                         |                                              |
| Black                                                                                               | 13 (7%)                 | 175 (11%)         | 18 (6%)                 | 177 (11%)                                    |
| White                                                                                               | 175 (88%)               | 1,313 (84%)       | 260 (89%)               | 1,397 (85%)                                  |
| Other                                                                                               | --                      | 82 (5%)           | 14 (5%)                 | 79 (5%)                                      |
| No. (%) of patients with weighted Charlson Comorbidity Index score <sup>a</sup> within stated range |                         |                   |                         |                                              |
| 0–3                                                                                                 | 18 (9%)                 | 175 (11%)         | 33 (11%)                | 172 (10%)                                    |
| 4–7                                                                                                 | 12 (6%)                 | 146 (9%)          | 22 (8%)                 | 162 (10%)                                    |
| 8–11                                                                                                | 146 (74%)               | 913 (58%)         | 194 (66%)               | 968 (59%)                                    |
| 12–15                                                                                               | 19 (10%)                | 300 (19%)         | 36 (12%)                | 316 (19%)                                    |
| 16–19                                                                                               | --                      | 35 (2%)           | --                      | 32 (2%)                                      |
| 20–24                                                                                               | 0 (0%)                  | --                | 0 (0%)                  | --                                           |
| Median Score                                                                                        | 9.0                     | 9.0               | 9.0                     | 9.0                                          |
| No. (%) of patients by type of eligibility                                                          |                         |                   |                         |                                              |
| Both Medicare and Medicaid                                                                          | --                      | 214 (14%)         | 22 (8%)                 | 234 (14%)                                    |
| One or the other                                                                                    | 188 (95%)               | 1,356 (86%)       | 270 (92%)               | 1,419 (86%)                                  |
| No. (%) of patients with specified numbers of mCRPC lines of therapy                                |                         |                   |                         |                                              |
| One                                                                                                 | 26 (13%)                | 734 (47%)         | 31 (11%)                | 726 (44%)                                    |
| Two                                                                                                 | 55 (28%)                | 439 (28%)         | 70 (24%)                | 525 (32%)                                    |
| Three                                                                                               | 61 (31%)                | 250 (16%)         | 90 (31%)                | 250 (15%)                                    |
| Four                                                                                                | 32 (16%)                | 109 (7%)          | 53 (18%)                | 132 (8%)                                     |
| Five                                                                                                | 16 (8%)                 | 33 (2%)           | 37 (13%)                | 20 (1%)                                      |
| Six                                                                                                 | --                      | --                | 11 (4%)                 | 0 (0%)                                       |
| Median time to mCRPC second line therapy (months)                                                   | 4.4                     | 9.2               | 5.2                     | 9.3                                          |
| Opioid utilization around index <sup>b</sup>                                                        |                         |                   |                         |                                              |
| Chronic use                                                                                         | 19 (10%)                | 274 (17%)         | 24 (8%)                 | 304 (18%)                                    |
| No chronic use                                                                                      | 179 (90%)               | 1,296 (83%)       | 268 (92%)               | 1,349 (82%)                                  |

|                                                                                                           |           |             |           |             |
|-----------------------------------------------------------------------------------------------------------|-----------|-------------|-----------|-------------|
| No. (%) of patients having multiple metastasis sites <sup>c</sup>                                         |           |             |           |             |
| Yes                                                                                                       | 39 (20%)  | 373 (24%)   | 55 (19%)  | 419 (25%)   |
| No                                                                                                        | 159 (80%) | 1,197 (76%) | 237 (81%) | 1,234 (75%) |
| No. (%) of patients having $\geq 1$ SRE <sup>d</sup> around index date                                    |           |             |           |             |
| Yes                                                                                                       | 26 (13%)  | 335 (21%)   | 30 (10%)  | 369 (22%)   |
| No                                                                                                        | 172 (87%) | 1,235 (79%) | 262 (90%) | 1,284 (78%) |
| No. (%) of patients by number of days of corticosteroid use within 6 months after index date <sup>e</sup> |           |             |           |             |
| < 60 Days                                                                                                 | 193 (97%) | 1,533 (98%) | 287 (98%) | 1,601 (97%) |
| $\geq 60$ Days                                                                                            | --        | 37 (2%)     | --        | 52 (3%)     |
| No. (%) of patients by corticosteroid PDC <sup>f</sup> within 6 months after index date <sup>e</sup>      |           |             |           |             |
| < 0.2                                                                                                     | 193 (97%) | 1,517 (97%) | 286 (98%) | 1,579 (96%) |
| 0.2–0.4                                                                                                   | 0 (0%)    | --          | --        | 19 (1%)     |
| 0.4–0.6                                                                                                   | --        | --          | --        | 19 (1%)     |
| 0.6–0.8                                                                                                   | --        | --          | --        | --          |
| > 0.8                                                                                                     | --        | 30 (2%)     | 0 (0%)    | 29 (2%)     |

Abbreviation: ASPI, androgen signaling pathway inhibitor; CI, confidence interval; coeff, coefficient; cov, covariate; PDC, proportion of days covered; ref, reference; v., versus; na=not applicable; --=indicates cell was suppressed due to insufficient numbers of patients available

<sup>a</sup> Charlson comorbidity index score was assigned based on claims in year before the index date. A score of 0 indicates that no comorbidities were found; worse comorbidity was indicated by higher scores, with a maximum score possible of 33

<sup>b</sup> Chronic opioid use defined as two or more 30-day scripts within 60 days before or after the index date

<sup>c</sup> 1+ claims in year before the index date

<sup>d</sup> 1+ claims in the 90 days before until 90 days after the index date

<sup>e</sup> PDC=Proportion of Days Covered refers to the numbers of day supply of corticosteroids divided by the difference of total days alive in the study minus the number of days spent in inpatient or skilled nursing facility care.

<sup>f</sup> Corticosteroid-use related variables shown here do not include abiraterone users receiving corticosteroid as per abiraterone label.
